# Supplementary material for: White light-induced AIEgen polyurethane films containing Schiff base copper(ii) complexes for synergistic chemo/photodynamic antibacterial therapy
Source: Royal Society of Chemistry journal article supplement (doi:10.1039/d2py00061j), 2022-01-01
Supplement: d2py00061j1.pdf [file d2py00061j1.pdf]

# White light-induced AIEgens Polyurethane film containing Schiff base Copper(II) Complexes for synergistic chemo/photodynamic antibacterial therapy †

Shiyu Wang,<sup>a, ‡</sup> Li Ma,<sup>a, ‡</sup> Shuang Wang,<sup>a, b</sup> Yazhou Wang,<sup>c</sup> Gongyan Liu,<sup>a, b\*</sup> Haibo Wang,<sup>a, b\*</sup>

<sup>a</sup>College of Biomass Science and Engineering, Sichuan University, Chengdu 610065, PR China. Tel: +86-28-85401296.

<sup>b</sup>The Key Laboratory of Leather Chemistry and Engineering of Ministry of Education, Sichuan University, Chengdu 610065, PR China.

<sup>c</sup>Sinopec, Shengli Oilfield, Chunliang Oil Prod Plant, Dongying 256600, Shangdong, China.

\*Correspondence to: H. Wang (E-mail: [whb6985@scu.edu.cn](mailto:whb6985@scu.edu.cn)), G. Liu ([lgy3506@scu.edu.cn](mailto:lgy3506@scu.edu.cn)).

‡These authors contributed equally to this paper.

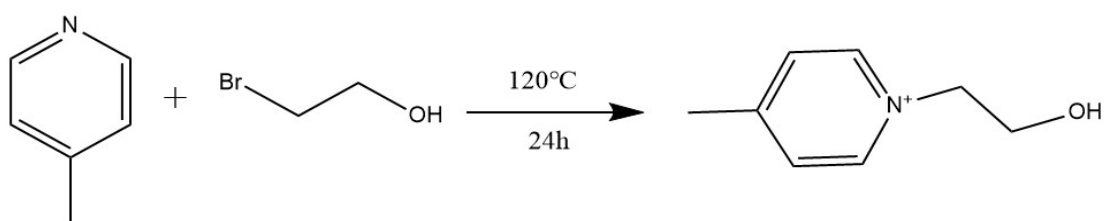

**Scheme S1.** Synthetic route to compound 1.

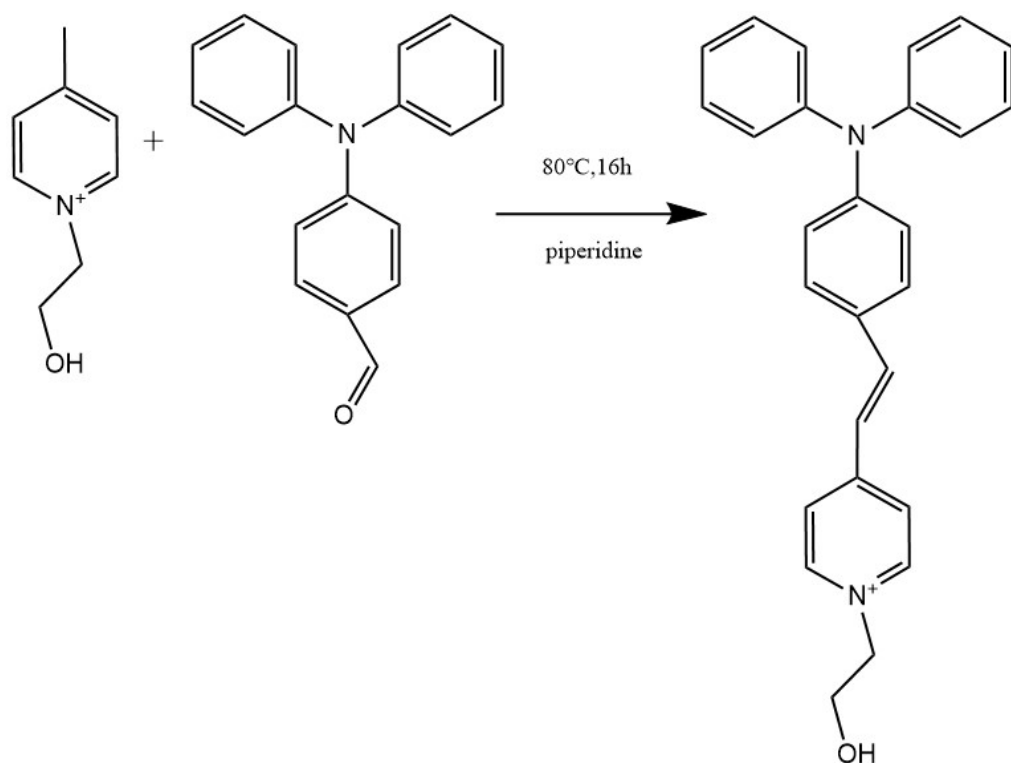

**Scheme S2.** Synthetic route to TPA-1OH.

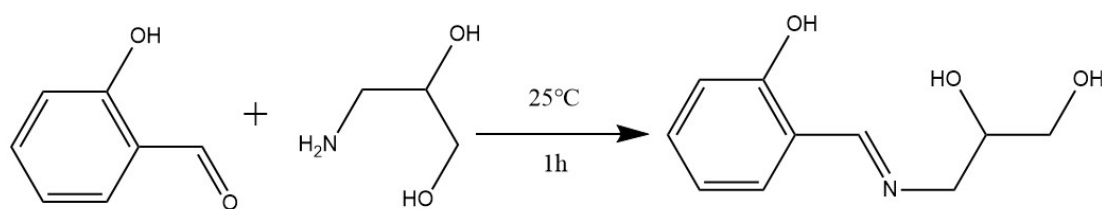

**Scheme S3.** Synthetic route to compound 3.



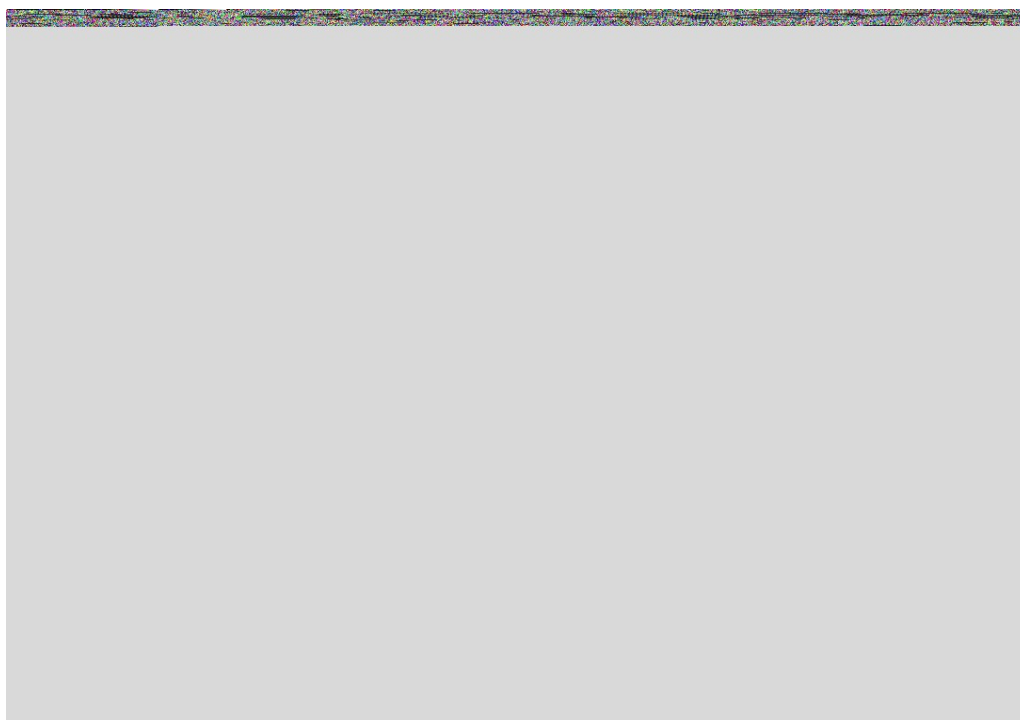

**Fig. S3.** <sup>1</sup>H NMR spectrum of TPA-1OH (DMSO).

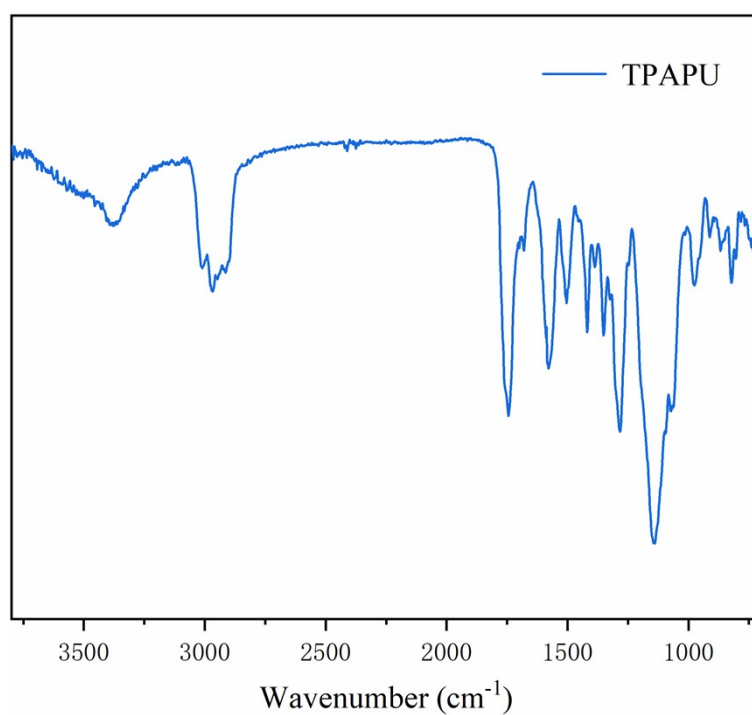

**Fig. S4.** FTIR spectrum of TPAPU.

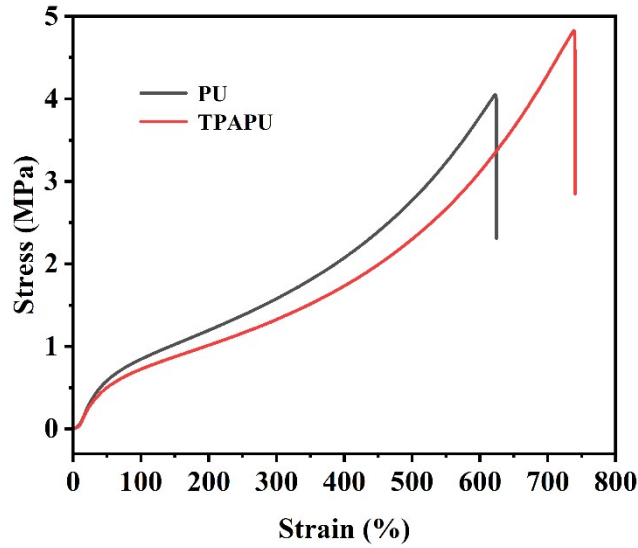

**Fig. S5.** The tensile stress-strain curves of PU and TPAPU.

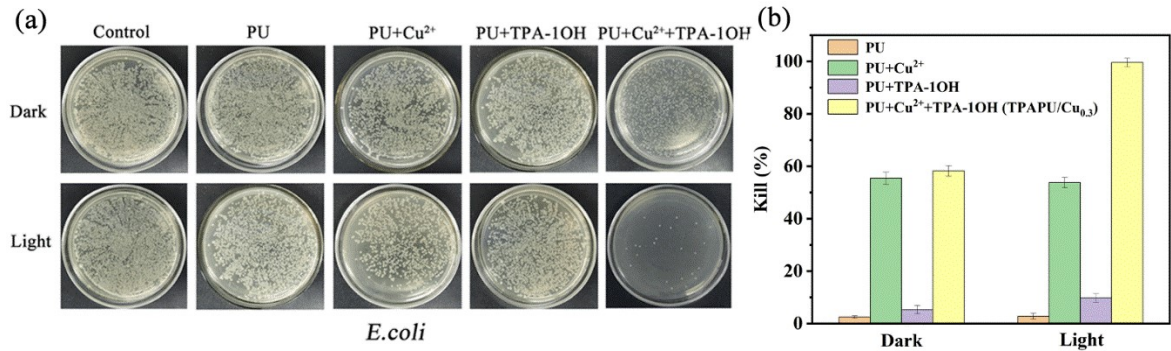

**Fig. S6.** (a) Bacterial killing ability of PU, PU+Cu<sup>2+</sup>, PU+TPA-1OH, PU+Cu<sup>2+</sup>+TPA-1OH (TPAPU/Cu<sub>0.3</sub>) composite film. Plates of *E. coli* after incubation with or without white light irradiation for two hours. (b) Statistical analysis of antibacterial date of PU, PU+Cu<sup>2+</sup>, PU+TPA-1OH, PU+Cu<sup>2+</sup>+TPA-1OH (TPAPU/Cu<sub>0.3</sub>) composite film.

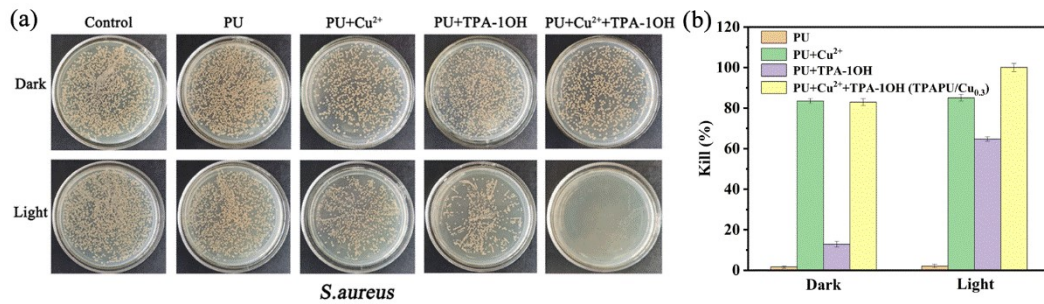

**Fig. S7.** (a) Bacterial killing ability of PU, PU+Cu<sup>2+</sup>, PU+TPA-1OH, PU+Cu<sup>2+</sup>+TPA-1OH (TPAPU/Cu<sub>0.3</sub>) composite film. Plates of *S. aureus* after incubation with or without white light irradiation for two hours. (b) Statistical analysis of antibacterial date of PU, PU+Cu<sup>2+</sup>, PU+TPA-1OH, PU+Cu<sup>2+</sup>+TPA-1OH (TPAPU/Cu<sub>0.3</sub>) composite film.

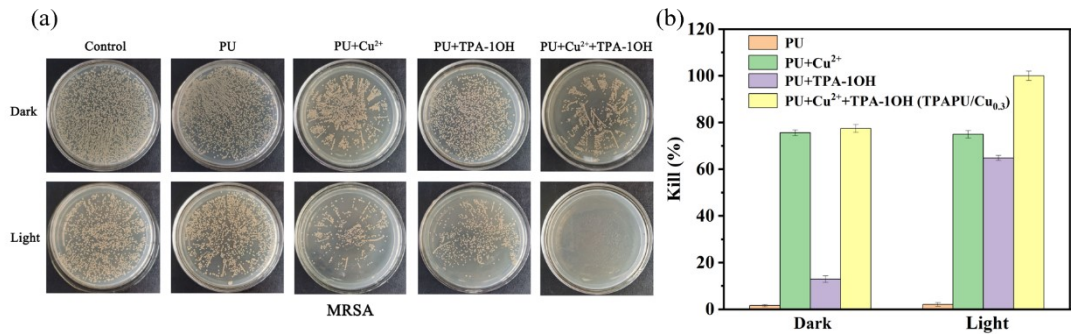

**Fig. S8.** (a) Bacterial killing ability of PU, PU+Cu<sup>2+</sup>, PU+TPA-1OH, PU+Cu<sup>2+</sup>+TPA-1OH (TPAPU/Cu<sub>0.3</sub>) composite film. Plates of MRSA after incubation with or without white light irradiation for two hours. (b) Statistical analysis of antibacterial date of PU, PU+Cu<sup>2+</sup>, PU+TPA-1OH, PU+Cu<sup>2+</sup>+TPA-1OH (TPAPU/Cu<sub>0.3</sub>) composite film.
